# Supplementary material
Source: publisher site journal article supplement (https://www.dovepress.com/get_supplementary_file.php?f=485400.xlsx)
Supplement: Supplementary file 1 [file get_supplementary_file.php]

## Sheet: Sheet1
Supplementary Table 1 Sensitivity Analysis of GLIM Criteria based on Different NLR and CAR Cutoffs
Different cutoffs	Composite outcome	Systemic complications	Organ failure	Local complications	Infectious complications	Severe acute pancreatitis	Length of stay (days)	Hospitalization costs (yuan)
	OR (95%CI)	OR (95%CI)	OR (95%CI)	OR (95%CI)	OR (95%CI)	OR (95%CI)	OR (95%CI)	OR (95%CI)
GLIM NLR4.6	1.463(0.622～3.442)	0.925(0.230～3.714)	1.015(0.329～3.135)	3.715(1.452～9.509)	2.790(0.697～11.168)	1.035(0.254～4.219)	2.70(0.05～5.36)	6695.00(-5690.93～19080.94)
GLIM NLR4.7	1.553(0.656～3.672)	0.956(0.237～3.845)	1.063(0.343～3.292)	3.970(1.540～10.232)	2.921(0.727～11.743)	1.071(0.262～4.371)	2.97(0.29～5.65)	7540.87(-4977.97～20059.70)
GLIM NLR4.8	1.553(0.656～3.672)	0.956(0.237～3.845)	1.063(0.343～3.292)	3.970(1.540～10.232)	2.921(0.727～11.743)	1.071(0.262～4.371)	2.97(0.29～5.65)	7540.87(-4977.97～20059.70)
GLIM NLR4.9	1.553(0.656～3.672)	0.956(0.237～3.845)	1.063(0.343～3.292)	3.970(1.540～10.232)	2.921(0.727～11.743)	1.071(0.262～4.371)	2.96(0.26～5.65)	8081.87(-4460.71～20624.45)
GLIM CAR0.8	3.541(1.439～8.714)	3.004(0.914～9.878)	2.610(0.919～7.414)	7.971(2.919～21.765)	7.040(1.865～26.571)	3.272(0.973～10.999)	3.88(1.02～6.75)	17214.79(3890.98～30538.60)
GLIM CAR3.4	4.028(1.549～10.474)	4.069(1.196～13.845)	3.640(1.235～10.728)	8.378(2.894～24.253)	9.901(2.450～40.007)	4.475(1.282～15.626)	4.58(1.56～7.61)	20570.01(6503.04～34636.98)
GLIM CAR4.5	5.376(1.934～14.940)	4.429(1.284～15.274)	4.088(1.357～12.316)	12.801(4.005～40.917)	11.458(2.764～47.498)	4.871(1.377～17.236)	4.80(1.64～7.97)	22762.10(8086.83～37437.38)
GLIM CAR5.0	4.748(1.695～13.303)	4.836(1.398～16.728)	4.482(1.473～13.633)	10.590(3.340～33.576)	13.999(3.286～59.644)	5.226(1.475～18.514)	4.96(1.74～8.18)	23425.25(8480.36～38370.14)
GLIM CAR7.5	3.969(1.364～11.543)	2.550(0.603～10.784)	2.857(0.848～9.627)	8.471(2.582～27.796)	5.994(1.245～28.843)	2.688(0.620～11.650)	4.58(1.11～8.04)	11984.99(-4207.10～28177.07)
Abbreviations: CAR, C-reactive protein /albumin ratio; GLIM, Global Leadership Initiative on Malnutrition; NLR, neutrophil/lymphocyte ratio.
